# Supplementary material for: Highly stable and flexible Li-ion battery anodes based on TiO2 coated 3D carbon nanostructures
Source: Royal Society of Chemistry journal article supplement (doi:10.1039/c5ta04436g), 2015-01-01
Supplement: c5ta04436g1.pdf [file c5ta04436g1.pdf]

## Supporting Information for

# Highly stable and flexible Li-ion battery anodes based on TiO<sub>2</sub> coated 3D carbon nanostructures

Xing Hui Wang,<sup>a</sup> Cao Guan,<sup>b</sup> Lei Meng Sun,<sup>a</sup> Rahmat Agung Susantyoko,<sup>a</sup> Hong Jin Fan,<sup>\*b</sup> and Qing Zhang<sup>\*a</sup>

<sup>a</sup>NOVITAS, Nanoelectronics Centre of Excellence, School of Electrical and Electronic Engineering, Nanyang Technological University, Singapore 639798; E-mail: [eqzhang@ntu.edu.sg](mailto:eqzhang@ntu.edu.sg)

<sup>b</sup> School of Physical and Mathematical Sciences, Nanyang Technological University, Singapore 637371, Singapore; E-mail: [fanhj@ntu.edu.sg](mailto:fanhj@ntu.edu.sg)

## Experiments Section

*Materials Synthesis:* Growth of carbon nanowire arrays on the microfibers of carbon cloth (CC, CeTech Co., Ltd.) was carried out via the thermal chemical vapor deposition (TCVD) method. Typically, 1 nm thick Fe film deposited on CC by electron beam evaporator was used as the catalyst, acetylene (C<sub>2</sub>H<sub>2</sub>) with a flowing rate of 100 sccm was used as the carbon source, and a mixture of Ar (400 sccm) and H<sub>2</sub> (50 sccm) was used as the carrying gas. The growth temperature and time were 800 °C and 20 mins, respectively.

Prior to atomic layer deposition (ALD) TiO<sub>2</sub>, the fabricated carbon nanowire arrays on CC were treated with oxygen plasma. The reactive ion etching (RIE) was performed on a March PX-250 plasma etching system with 10 sccm oxygen gas flow. The chamber pressure, RF power and exposure time were 70 mTorr, 100 W and 10 min, respectively. ALD coating of TiO<sub>2</sub> was carried out in the

Beneq system (TFS 200) at 120 °C using  $\text{TiCl}_4$  and water as the titanium and oxygen source, respectively. During the deposition, the reaction chamber was maintained at 1.0 mbar with a steady  $\text{N}_2$  steam (200 sccm). Each ALD cycle consisted of a 300 ms precursor pulse and 2 s purging time with  $\text{N}_2$ . 500 cycles were applied to obtain  $\text{TiO}_2$  thin film in this work. The mass loading of the  $\text{TiO}_2$  coating was determined by weighing before and after ALD deposition using a microbalance (Mettler, XP26) with an accuracy of 0.002 mg. The mass loading density of the carbon nanowire arrays and  $\text{TiO}_2$  was calculated to be  $\sim 1.0$  and  $4.0 \text{ mg/cm}^2$ , respectively. Besides, 830 ALD cycles were employed to obtain  $\sim 60 \text{ nm}$   $\text{TiO}_2$ , corresponding to a higher mass loading density of  $7.0 \text{ mg/cm}^2$ .

*Structural Characterization:* The morphology of the prepared samples was investigated using field-emission scanning electron microscopy (SEM, LEO 1550 Gemini) with accelerating voltage of 5.00 kV and transmission electron microscopy (TEM, JEOL 2010F) with accelerating voltage of 200 kV.

*Electrochemical Characterization:* Electrochemical measurements were carried out using CR-2032 type coin cell with Li foil serving as both reference and counter electrode. CC with  $\text{C@TiO}_2$  core-shell nanowire arrays (NCAs) was used directly as the binder-free working electrode. The cells were assembled in a high purity Ar filled glove box ( $\text{H}_2\text{O} < 0.5 \text{ ppm}$ ,  $\text{O}_2 < 0.5 \text{ ppm}$ , Innovative Technology). The electrolyte was made from 1 M lithium hexafluorophosphate ( $\text{LiPF}_6$ ) dissolved in ethylene carbonate and dimethyl carbonate (EC/DMC, 1:1 by volume) containing 5.0 vol% fluoroethylene carbonate (FEC, Aldrich). Similarly, the whole battery was assembled by using the CC with  $\text{C@TiO}_2$  core-shell NCAs as the anode and an Al foil with commercial  $\text{LiMn}_2\text{O}_4$  as the cathode. The whole flexible battery was sealed by polyethylene tapes (3M) in glove box. The galvanostatic discharge-charge measurements were carried out using a multichannel battery tester (Neware, BTS-610). The discharge of the first cycle was performed from the open circuit potential to 1 V, and all the

following tests were carried out within a voltage window of 1-3 V.

## Supplementary Figure

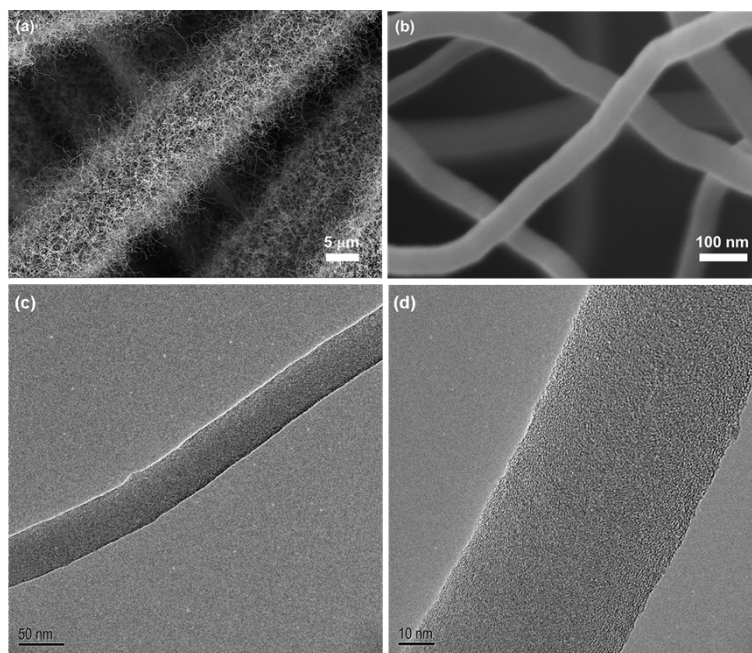

**Fig. S1** Morphology characterization of the hierarchical 3D carbon nanowire arrays (CNWAs) on carbon cloth. (a) Low and (b) high magnification SEM images of the hierarchical 3D 3D CNWAs. (c) TEM and (d) HRTEM images of a carbon nanowire.

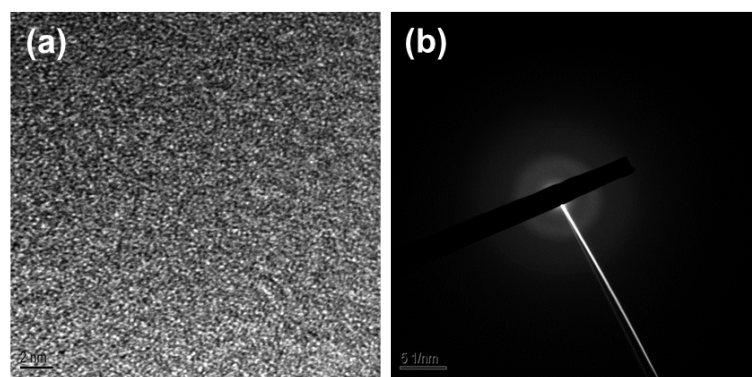

**Fig. S2** (a) The HRTEM image and (b) selected-area electron diffraction (SAED) pattern of the TiO<sub>2</sub> layer.

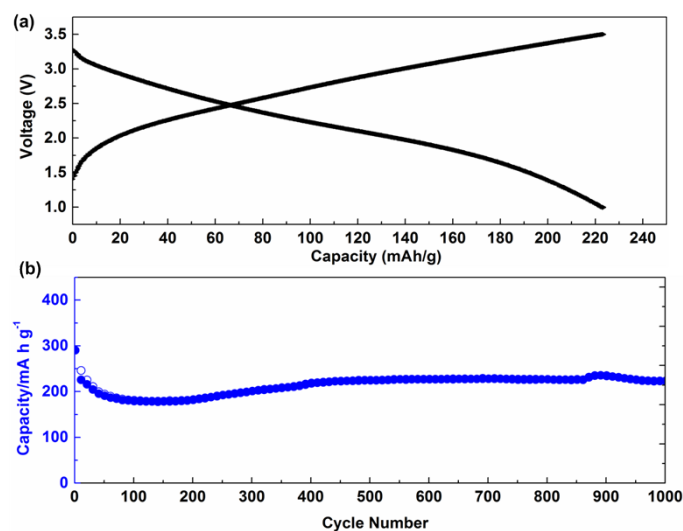

**Fig. S3** (a) The typical voltage profile and (b) capacity retention of C@TiO<sub>2</sub>/LiMn<sub>2</sub>O<sub>4</sub> whole battery at a current density of 5 C in the voltage range of 1-3.5 V.

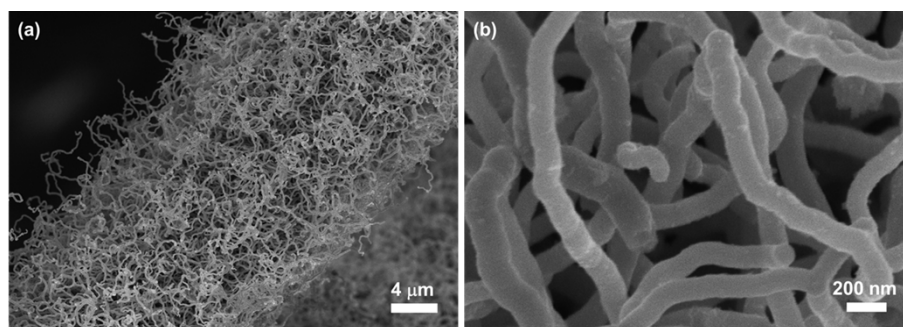

**Fig. S4** (a) Low and (b) high magnification SEM images of the hierarchical 3D C@TiO<sub>2</sub> core-shell NCAs after 2000 cycles at a high rate of 5 C.

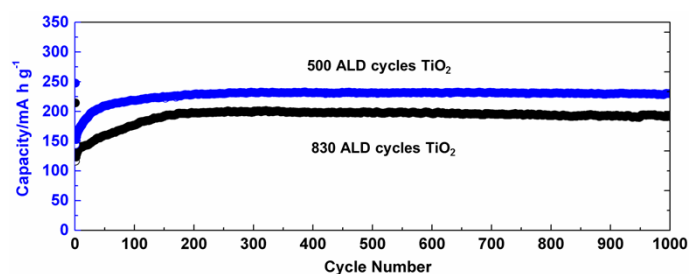

**Fig. S5** Capacity retention of the C@TiO<sub>2</sub> core-shell NCAs electrodes with 500 and 830 ALD cycles at a current rate of 1 C.
